# Supplementary material
Source: PubMed Central journal article supplement (PMC9329233)
Supplement: NIHMS1811979-supplement-1811979_Sup_Tables.pdf [file NIHMS1811979-supplement-1811979_Sup_Tables.pdf]

# Genome-wide polygenic score with APOL1 risk genotypes predicts chronic kidney disease across ancestries

## Supplementary Information

### Contents

#### Supplementary Tables

|                             |    |
|-----------------------------|----|
| Supplementary Table 1.....  | 2  |
| Supplementary Table 2.....  | 3  |
| Supplementary Table 3.....  | 4  |
| Supplementary Table 4.....  | 5  |
| Supplementary Table 5.....  | 6  |
| Supplementary Table 6.....  | 7  |
| Supplementary Table 7.....  | 8  |
| Supplementary Table 8.....  | 9  |
| Supplementary Table 9.....  | 10 |
| Supplementary Table 10..... | 11 |
| Supplementary Table 11..... | 12 |

**Supplementary Table 1:** Association of candidate polygenic scores with CKD in the first UKBB optimization dataset (70% of UKBB Europeans). Odds ratio (OR) per standard deviation (SD) of each risk score, and area under the receiver-operator curve (AUC) were calculated in the UKBB optimization dataset of 177,208 Europeans with adjustment for age, sex, diabetes, first four principal components of ancestry and genotyping batch; AUC crude and variance explained are calculated for the risk score component alone without any covariates;  $r^2$ : linkage disequilibrium pruning threshold;  $\rho$ -tuning parameter to model the proportion of variants assumed to be causal; the best performing score is highlighted in red. Variance explained is estimated as a Nagelkerke pseudo  $R^2$  and refers to the variance in case-control status. The best model is highlighted in bold.

| Method     | Parameter        | N variants    | OR* per SD of GPS | P-value               | AUC (Adjusted*) | AUC (Crude)   | Variance Explained |
|------------|------------------|---------------|-------------------|-----------------------|-----------------|---------------|--------------------|
| P+T        | P=1.0E-01        | 89,880        | 1.85              | P<1.00E-300           | 0.8383          | 0.6505        | 0.0436             |
| P+T        | P=1.0E-02        | 21,764        | 1.84              | P<1.00E-300           | 0.8391          | 0.6516        | 0.0440             |
| P+T        | P=1.0E-03        | 7,486         | 1.79              | P<1.00E-300           | 0.8371          | 0.6443        | 0.0404             |
| P+T        | P=1.0E-04        | 3,598         | 1.78              | P<1.00E-300           | 0.8366          | 0.6419        | 0.0393             |
| P+T        | P=1.0E-05        | 2,111         | 1.76              | P<1.00E-300           | 0.8357          | 0.6393        | 0.0376             |
| P+T        | P=1.0E-06        | 1,407         | 1.75              | P<1.00E-300           | 0.8355          | 0.6383        | 0.0369             |
| P+T        | P=1.0E-07        | 1,028         | 1.75              | P<1.00E-300           | 0.8352          | 0.6380        | 0.0367             |
| P+T        | P=1.0E-08        | 753           | 1.73              | P<1.00E-300           | 0.8343          | 0.6354        | 0.0352             |
| <b>P+T</b> | <b>P=3.0E-02</b> | <b>41,426</b> | <b>1.86</b>       | <b>P&lt;1.00E-300</b> | <b>0.8391</b>   | <b>0.6524</b> | <b>0.0448</b>      |
| P+T        | P=3.0E-03        | 11,918        | 1.82              | P<1.00E-300           | 0.8383          | 0.6490        | 0.0427             |
| P+T        | P=3.0E-04        | 4,971         | 1.79              | P<1.00E-300           | 0.8370          | 0.6434        | 0.0400             |
| P+T        | P=3.0E-05        | 2,675         | 1.76              | P<1.00E-300           | 0.8360          | 0.6401        | 0.0383             |
| LDPred     | $\rho=1.0E+00$   | 5,440,627     | 1.83              | P<1.00E-300           | 0.8377          | 0.6506        | 0.0430             |
| LDPred     | $\rho=1.0E-01$   | 5,440,627     | 1.20              | P=1.14E-44            | 0.8159          | 0.5470        | 0.0039             |
| LDPred     | $\rho=1.0E-02$   | 5,440,627     | 1.16              | P=1.06E-29            | 0.8153          | 0.5390        | 0.0025             |
| LDPred     | $\rho=1.0E-03$   | 5,440,627     | 1.14              | P=1.36E-23            | 0.8148          | 0.5326        | 0.0020             |
| LDPred     | $\rho=3.0E-01$   | 5,440,627     | 1.72              | P<1.00E-300           | 0.8330          | 0.6345        | 0.0341             |
| LDPred     | $\rho=3.0E-02$   | 5,440,627     | 1.12              | P=1.01E-18            | 0.8146          | 0.5285        | 0.0015             |
| LDPred     | $\rho=3.0E-03$   | 5,440,627     | 1.17              | P=1.25E-31            | 0.8152          | 0.5385        | 0.0027             |

\* Adjusted for age, sex, diabetes, the first four principal components of ancestry and genotyping batch.

**Supplementary Table 2:** Mutually-adjusted effects for *APOL1* risk genotype and the best GPS from the first optimization cohort when tested in the second optimization cohort of African ancestry for association with CKD stage 3 or above.

| Model *                                        | Effect ( $\beta$ ) | OR (95% CI)      | P-value     |
|------------------------------------------------|--------------------|------------------|-------------|
| Standardized GPS                               | 0.15               | 1.16 (1.09-1.24) | P=1.0E-04   |
| <i>APOL1</i> risk genotype                     | 0.17               | 1.19 (1.01-1.38) | P=4.0E-02   |
| GPS and <i>APOL1</i> risk genotype interaction | 0.09               | 1.09 (0.93-1.28) | P=0.29 (NS) |

\* adjusted for age, sex, diabetes, four principal components of ancestry, and genotyping batch.

**Supplemental Table 3: GPS performance meta-analysis for testing cohorts of European ancestry (14,201 cases and 82,849 controls in total)**

| Cohort        | Case/control  | OR per SD (95% CI), P-value   | AUC (Crude) | PRS Threshold         | Odds ratio (95% CI), P value  |
|---------------|---------------|-------------------------------|-------------|-----------------------|-------------------------------|
| <b>UKBB</b>   | 2,759/72,968  | 1.82 (1.78-1.86), P=1.32E-190 | 0.84 (0.65) | Top 20% vs. other 80% | 2.86 (2.78-2.94), P=3.19E-135 |
|               |               |                               |             | Top 10% vs. other 90% | 3.25 (3.15-3.35), P=6.43E-123 |
|               |               |                               |             | Top 5% vs. other 95%  | 3.56 (3.44-3.68), P=5.09E-90  |
|               |               |                               |             | Top 2% vs. other 98%  | 4.10 (3.92-4.28), P=2.92E-54  |
|               |               |                               |             | Top 1% vs. other 99%  | 4.95 (4.72-5.18), P=6.03E-41  |
| <b>eMERGE</b> | 10,572/8,030  | 1.38 (1.35-1.40), P=1.58E-83  | 0.77 (0.60) | Top 20% vs. other 80% | 1.84 (1.69-2.00), P=1.54E-45  |
|               |               |                               |             | Top 10% vs. other 90% | 1.90 (1.70-2.14), P=5.87E-28  |
|               |               |                               |             | Top 5% vs. other 95%  | 2.15 (1.83-2.54), P=7.49E-20  |
|               |               |                               |             | Top 2% vs. other 98%  | 2.65 (2.02-3.48), P=1.35E-12  |
|               |               |                               |             | Top 1% vs. other 99%  | 3.22 (2.17-4.78), P=6.80E-09  |
| <b>BioME</b>  | 870/1,851     | 1.58 (1.46-1.70), P=2.50E-14  | 0.91 (0.65) | Top 20% vs. other 80% | 2.42 (2.13-2.71), P=1.39E-09  |
|               |               |                               |             | Top 10% vs. other 90% | 2.31 (1.94-2.68), P=7.88E-06  |
|               |               |                               |             | Top 5% vs. other 95%  | 1.99 (1.50-2.48), P=5.57E-03  |
|               |               |                               |             | Top 2% vs. other 98%  | 3.39 (2.60-4.18), P=2.54E-03  |
|               |               |                               |             | Top 1% vs. other 99%  | 5.87 (4.74-7.00), P=2.01E-03  |
| <b>Meta</b>   | 14,201/82,849 | 1.46 (1.43-1.48), P<1.00E-300 | 0.81 (0.62) | Top 20% vs. other 80% | 2.30 (2.17-2.44), P=1.65E-174 |
|               |               |                               |             | Top 10% vs. other 90% | 2.59 (2.40-2.78), P=1.27E-142 |
|               |               |                               |             | Top 5% vs. other 95%  | 2.92 (2.65-3.21), P=2.64E-104 |
|               |               |                               |             | Top 2% vs. other 98%  | 3.60 (3.11-4.17), P=4.26E-66  |
|               |               |                               |             | Top 1% vs. other 99%  | 4.46 (3.66-5.44), P=7.82E-50  |

OR: Odds ratio for the model adjusted for age, sex, diabetes, principal components of ancestry and genotyping array or clinical site; SD: standard deviation of the GPS distribution in controls; AUC: area under the receiver-operator curve for the model adjusted for age, sex, diabetes, principal components of ancestry and genotyping array or clinical site (crude: AUC for GPS alone without any covariates).

**Supplementary Table 4:** Overall frequencies of *APOL1* G1 and G2 risk alleles and *APOL1* risk genotypes in African American, Admixed/Latinx and European cohorts included in the study.

| Ancestry        | Cohorts (cases and controls combined) | <i>APOL1</i> 1072A>G (rs73885319) | <i>APOL1</i> 1200T>G (rs60910145) | <i>APOL1</i> 1212-del6 (rs71785313) | <i>APOL1</i> computed risk genotype (G1G1, G1G2, or G2G2) |
|-----------------|---------------------------------------|-----------------------------------|-----------------------------------|-------------------------------------|-----------------------------------------------------------|
| <b>African</b>  | UKBB (N=7,158)                        | 0.28                              | 0.28                              | 0.15                                | 0.12                                                      |
|                 | eMERGE (N=2,743)                      | 0.23                              | 0.22                              | 0.13                                | 0.18                                                      |
|                 | BioMe (N=1,878)                       | 0.23                              | 0.23                              | 0.13                                | 0.14                                                      |
|                 | HyperGEN (N=728)                      | 0.23                              | 0.23                              | 0.15                                | 0.14                                                      |
|                 | REGARDS (N=5,369)                     | 0.22                              | 0.21                              | 0.13                                | 0.12                                                      |
|                 | GenHat (N=3,378)                      | 0.21                              | 0.2                               | 0.13                                | 0.12                                                      |
|                 | Warfarin (N=448)                      | 0.25                              | 0.24                              | 0.14                                | 0.18                                                      |
| <b>Latinx</b>   | eMERGE (N=915)                        | 0.05                              | 0.05                              | 0.04                                | 0.03                                                      |
|                 | BioMe (N=2,710)                       | 0.05                              | 0.05                              | 0.04                                | 0.01                                                      |
| <b>European</b> | UKBB (N=75,727)                       | 3.75E-05                          | 1.96E-04                          | 2.91E-05                            | <0.01                                                     |
|                 | eMERGE (N=18,602)                     | 7.80E-04                          | 7.80E-04                          | 2.43E-04                            | <0.01                                                     |
|                 | BioMe (N=2,721)                       | 7.35E-04                          | 7.35E-04                          | 3.68E-04                            | <0.01                                                     |

**Supplementary Table 5: GPS performance meta-analysis for testing cohorts of African ancestry (4,268 cases and 10,276 controls in total).**

| Cohort          | Case/control | OR per SD (95% CI), P-value  | AUC (Crude) | PRS Threshold         | Odds ratio (95% CI), P value |
|-----------------|--------------|------------------------------|-------------|-----------------------|------------------------------|
| <b>eMEGRE</b>   | 1,143/1,600  | 1.31 (1.09-1.56), P=1.30E-09 | 0.79 (0.57) | Top 20% vs. other 80% | 1.56 (1.26-1.94), P=5.52E-05 |
|                 |              |                              |             | Top 10% vs. other 90% | 1.71 (1.28-2.28), P=2.50E-04 |
|                 |              |                              |             | Top 5% vs. other 95%  | 2.16 (1.45-3.23), P=1.77E-04 |
|                 |              |                              |             | Top 2% vs. other 98%  | 2.60 (1.38-4.90), P=3.10E-03 |
|                 |              |                              |             | Top 1% vs. other 99%  | 2.51 (1.02-6.14), P=4.41E-02 |
| <b>BioME</b>    | 729/1,149    | 1.44 (1.33-1.55), P=7.70E-11 | 0.81 (0.57) | Top 20% vs. other 80% | 2.05 (1.78-2.32), P=2.00E-07 |
|                 |              |                              |             | Top 10% vs. other 90% | 2.70 (2.34-3.06), P=6.00E-08 |
|                 |              |                              |             | Top 5% vs. other 95%  | 3.46 (2.97-3.95), P=8.00E-07 |
|                 |              |                              |             | Top 2% vs. other 98%  | 5.75 (4.96-6.54), P=1.00E-05 |
|                 |              |                              |             | Top 1% vs. other 99%  | 7.10 (5.93-8.27), P=1.00E-03 |
| <b>HyperGen</b> | 109/619      | 1.26 (1.01-1.57), P=3.79E-02 | 0.77 (0.56) | Top 20% vs. other 80% | 1.37 (0.81-2.31), P=2.30E-01 |
|                 |              |                              |             | Top 10% vs. other 90% | 1.91 (1.00-3.66), P=4.97E-02 |
|                 |              |                              |             | Top 5% vs. other 95%  | 1.92 (0.78-4.73), P=1.53E-01 |
|                 |              |                              |             | Top 2% vs. other 98%  | 1.64 (0.43-6.20), P=4.65E-01 |
|                 |              |                              |             | Top 1% vs. other 99%  | 1.28 (0.20-8.09), P=7.91E-01 |
| <b>REGARDS</b>  | 1,055/4,314  | 1.22 (1.13-1.32), P=3.45E-07 | 0.77 (0.56) | Top 20% vs. other 80% | 1.46 (1.23-1.75), P=2.04E-05 |
|                 |              |                              |             | Top 10% vs. other 90% | 1.47 (1.16-1.85), P=1.03E-03 |
|                 |              |                              |             | Top 5% vs. other 95%  | 1.52 (1.11-2.07), P=7.49E-03 |
|                 |              |                              |             | Top 2% vs. other 98%  | 1.56 (0.97-2.59), P=6.52E-02 |
|                 |              |                              |             | Top 1% vs. other 99%  | 2.44 (1.29-4.58), P=5.54E-03 |
| <b>GenHat</b>   | 924/2,454    | 1.39 (1.27-1.52), P=1.43E-12 | 0.75 (0.61) | Top 20% vs. other 80% | 1.78 (1.47-2.17), P=5.18E-09 |
|                 |              |                              |             | Top 10% vs. other 90% | 2.16 (1.68-2.78), P=2.05E-09 |
|                 |              |                              |             | Top 5% vs. other 95%  | 2.17 (1.54-3.05), P=8.69E-06 |
|                 |              |                              |             | Top 2% vs. other 98%  | 4.38 (2.56-7.50), P=6.80E-08 |
|                 |              |                              |             | Top 1% vs. other 99%  | 7.02 (3.20-15.3), P=1.08E-06 |
| <b>Warfarin</b> | 308/140      | 1.18 (0.94-1.46), P=1.45E-01 | 0.71 (0.53) | Top 20% vs. other 80% | 1.76 (0.98-3.14), P=5.52E-02 |
|                 |              |                              |             | Top 10% vs. other 90% | 1.24 (0.59-2.61), P=5.66E-01 |
|                 |              |                              |             | Top 5% vs. other 95%  | 3.52 (0.94-13.1), P=6.10E-02 |
|                 |              |                              |             | Top 2% vs. other 98%  | 1.59 (0.28-8.73), P=5.96E-01 |
|                 |              |                              |             | Top 1% vs. other 99%  | -                            |
| <b>Meta</b>     | 4,268/10,276 | 1.32 (1.26-1.38), P=1.78E-33 | 0.78 (0.57) | Top 20% vs. other 80% | 1.65 (1.49-1.82), P=1.17E-22 |
|                 |              |                              |             | Top 10% vs. other 90% | 1.84 (1.61-2.09), P=9.26E-20 |
|                 |              |                              |             | Top 5% vs. other 95%  | 2.06 (1.72-2.47), P=2.11E-15 |
|                 |              |                              |             | Top 2% vs. other 98%  | 2.66 (2.01-3.51), P=4.93E-12 |
|                 |              |                              |             | Top 1% vs. other 99%  | 3.51 (2.37-5.22), P=4.21E-10 |

OR: Odds ratio for the model adjusted for age, sex, diabetes, principal components of ancestry and genotyping array or clinical site; SD: standard deviation of the GPS distribution in controls; AUC: area under the receiver-operator curve for the model adjusted for age, sex, diabetes, principal components of ancestry and genotyping array or clinical site (crude: AUC for GPS alone without any covariates).

**Supplementary Table 6:** GPS performance meta-analysis for testing cohorts of Latinx/Hispanic ancestry (1,386 cases and 2,239 controls in total).

| Cohort        | Case/control | OR per SD (95% CI), P-value  | AUC (Crude) | PRS Threshold         | Odds ratio (95% CI), P value  |
|---------------|--------------|------------------------------|-------------|-----------------------|-------------------------------|
| <b>eMERGE</b> | 382/533      | 1.33 (1.11-1.59), P=2.24E-03 | 0.86 (0.58) | Top 20% vs. other 80% | 2.34 (1.51-3.61), P=1.35E-04  |
|               |              |                              |             | Top 10% vs. other 90% | 2.26 (1.28-4.01), P=5.16E-03  |
|               |              |                              |             | Top 5% vs. other 95%  | 2.44 (1.11-5.34), P=2.28E-02  |
|               |              |                              |             | Top 2% vs. other 98%  | 6.89 (1.60-29.07), P=9.78E-03 |
|               |              |                              |             | Top 1% vs. other 99%  | 7.46 (1.18-47.10), P=3.26E-02 |
| <b>BioME</b>  | 1,004/1,706  | 1.47 (1.35-1.59), P=8.00E-10 | 0.89 (0.63) | Top 20% vs. other 80% | 1.74 (1.47-2.01), P=5.34E-05  |
|               |              |                              |             | Top 10% vs. other 90% | 2.26 (1.90-2.62), P=7.77E-06  |
|               |              |                              |             | Top 5% vs. other 95%  | 2.77 (2.27-3.27), P=6.27E-05  |
|               |              |                              |             | Top 2% vs. other 98%  | 4.48 (3.69-5.27), P=2.10E-04  |
|               |              |                              |             | Top 1% vs. other 99%  | 6.30 (5.13-7.47), P=2.07E-02  |
| <b>Meta</b>   | 1,386/2,239  | 1.42 (1.29-1.57), P=4.56E-12 | 0.88 (0.62) | Top 20% vs. other 80% | 1.88 (1.50-2.37), P=5.46E-08  |
|               |              |                              |             | Top 10% vs. other 90% | 2.26 (1.66-3.06), P=1.56E-07  |
|               |              |                              |             | Top 5% vs. other 95%  | 2.67 (1.75-4.07), P=4.96E-06  |
|               |              |                              |             | Top 2% vs. other 98%  | 4.93 (2.46-9.89), P=6.69E-06  |
|               |              |                              |             | Top 1% vs. other 99%  | 6.61 (2.46-17.75), P=1.77E-04 |

OR: Odds ratio for the model adjusted for age, sex, diabetes, principal components of ancestry and genotyping array or clinical site; SD: standard deviation of the GPS distribution in controls; AUC: area under the receiver-operator curve for the model adjusted for age, sex, diabetes, principal components of ancestry and genotyping array or clinical site (crude: AUC for GPS alone without any covariates).

**Supplementary Table 7: GPS performance meta-analysis for testing cohorts of Asian continental ancestry (392 cases and 8,233 controls in total).**

| Cohort                  | Case/Control | OR per SD (95% CI), P-value  | AUC (Crude) | PRS Threshold         | Odds ratio (95% CI), P value  |
|-------------------------|--------------|------------------------------|-------------|-----------------------|-------------------------------|
| <b>eMERGE (E.Asian)</b> | 96/97        | 1.76 (1.09-2.83), P=2.06E-02 | 0.92 (0.57) | Top 20% vs. other 80% | 4.57 (1.35-15.40), P=1.47E-02 |
|                         |              |                              |             | Top 10% vs. other 90% | 5.21 (1.24-21.90), P=2.44E-02 |
|                         |              |                              |             | Top 5% vs. other 95%  | 3.94 (0.57-27.40), P=1.68E-01 |
|                         |              |                              |             | Top 2% vs. other 98%  | 7.03 (0.27-182.0), P=2.38E-01 |
|                         |              |                              |             | Top 1% vs. other 99%  | 1.16 (.002-579.1), P=9.63E-01 |
| <b>UKBB (E.Asian)</b>   | 26/1,525     | 1.64 (1.14-2.14), P=5.05E-02 | 0.98 (0.67) | Top 20% vs. other 80% | 1.23 (0.04-2.42), P=7.30E-01  |
|                         |              |                              |             | Top 10% vs. other 90% | 0.98 (-0.53-2.50), P=9.83E-01 |
|                         |              |                              |             | Top 5% vs. other 95%  | 1.14 (-0.72-3.00), P=8.91E-01 |
|                         |              |                              |             | Top 2% vs. other 98%  | 3.25 (1.02-5.48), P=3.10E-01  |
|                         |              |                              |             | Top 1% vs. other 99%  | 9.30 (6.69-11.90), P=9.48E-02 |
| <b>UKBB (SW Asian)</b>  | 209/6,258    | 1.65 (1.49-1.81), P=4.03E-10 | 0.89 (0.61) | Top 20% vs. other 80% | 2.43 (2.09-2.77), P=2.49E-07  |
|                         |              |                              |             | Top 10% vs. other 90% | 2.89 (2.49-3.29), P=1.84E-07  |
|                         |              |                              |             | Top 5% vs. other 95%  | 3.86 (3.36-4.36), P=9.46E-08  |
|                         |              |                              |             | Top 2% vs. other 98%  | 3.39 (2.61-4.17), P=2.15E-03  |
|                         |              |                              |             | Top 1% vs. other 99%  | 7.77 (6.84-8.70), P=1.81E-05  |
| <b>BioMe (E. Asian)</b> | 61/353       | 1.89 (1.43-2.35), P=6.89E-03 | 0.89 (0.63) | Top 20% vs. other 80% | 2.61 (1.66-3.56), P=4.83E-02  |
|                         |              |                              |             | Top 10% vs. other 90% | 4.57 (3.41-5.73), P=1.05E-01  |
|                         |              |                              |             | Top 5% vs. other 95%  | 3.13 (1.11-5.15), P=2.65E-01  |
|                         |              |                              |             | Top 2% vs. other 98%  | 10.1 (7.71-12.5), P=5.78E-02  |
|                         |              |                              |             | Top 1% vs. other 99%  | 20.9 (18.3-23.5), P=2.26E-02  |
| <b>Meta</b>             | 392/8,233    | 1.68 (1.45-2.06), P=7.11E-13 | 0.91 (0.61) | Top 20% vs. other 80% | 2.42 (1.81-2.27), P=4.39E-09  |
|                         |              |                              |             | Top 10% vs. other 90% | 2.95 (2.06-4.20), P=2.43E-09  |
|                         |              |                              |             | Top 5% vs. other 95%  | 3.56 (2.26-5.60), P=4.09E-08  |
|                         |              |                              |             | Top 2% vs. other 98%  | 3.81 (1.91-7.59), P=1.35E-04  |
|                         |              |                              |             | Top 1% vs. other 99%  | 8.46 (3.70-19.3), P=4.00E-07  |

OR: Odds ratio for the model adjusted for age, sex, diabetes, principal components of ancestry and genotyping array or clinical site; SD: standard deviation of the GPS distribution in controls; AUC: area under the receiver-operator curve for the model adjusted for age, sex, diabetes, principal components of ancestry and genotyping array or clinical site (crude: AUC for GPS alone without any covariates).

**Supplementary Table 8:** Pooled sensitivity, specificity, and prevalence-adjusted PPV and NPV for extreme tail cut-offs (95<sup>th</sup> and 98<sup>th</sup> percentile) of the GPS distribution in controls. Based on the most recent CDC data from 2021, the CKD prevalence in the U.S. was assumed to be 12.7% in European Americans, 16.3% in African Americans, 13.60% in Hispanic Americans, and 12.9% in Asian Americans.

| <b>Ancestry</b>                           | <b>GPS Tail Cut-off</b> | <b>Sensitivity</b> | <b>Specificity</b> | <b>Prevalence-adjusted PPV*</b> | <b>Prevalence-adjusted NPV*</b> |
|-------------------------------------------|-------------------------|--------------------|--------------------|---------------------------------|---------------------------------|
| <b>European</b><br><b>(14,201/82,849)</b> | Top 5% vs. other 95%    | 0.713              | 0.732              | 0.279                           | 0.946                           |
|                                           | Top 2% vs. other 98%    | 0.711              | 0.731              | 0.277                           | 0.945                           |
| <b>African</b><br><b>(4,268/10,276)</b>   | Top 5% vs. other 95%    | 0.286              | 0.922              | 0.416                           | 0.868                           |
|                                           | Top 2% vs. other 98%    | 0.160              | 0.972              | 0.526                           | 0.855                           |
| <b>Asian</b><br><b>(392/8,233)</b>        | Top 5% vs. other 95%    | 0.911              | 0.914              | 0.613                           | 0.985                           |
|                                           | Top 2% vs. other 98%    | 0.928              | 0.817              | 0.439                           | 0.987                           |
| <b>Latinx</b><br><b>(1,386/2,239)</b>     | Top 5% vs. other 95%    | 0.735              | 0.826              | 0.330                           | 0.964                           |
|                                           | Top 2% vs. other 98%    | 0.717              | 0.864              | 0.453                           | 0.951                           |

\* PPV and NPV adjusted for race/ethnicity-specific CKD prevalence (CDC, 2021).

**Supplementary Table 9:** Comparison of the changes in GPS effects for the top 1%, 2%, and 5% tail cut-offs using different ancestry adjustment methods in the eMERGE-III dataset.

| Cut-off       | eMERGE Cohorts | Unadjusted<br>(Standardized using ancestry-matched controls) |                    | Ancestry-adjusted<br>(Method 1) |                   | Ancestry-adjusted<br>(Method 2) |                   |
|---------------|----------------|--------------------------------------------------------------|--------------------|---------------------------------|-------------------|---------------------------------|-------------------|
|               |                | Z-score                                                      | OR (95%CI)         | Z-score                         | OR (95%CI)        | Z-score                         | OR (95%CI)        |
| <b>Top 5%</b> | European       | 1.90                                                         | 2.15 (1.83-2.54)   | 2.88                            | 2.15 (1.99-2.31)  | 2.77                            | 2.30 (2.13-2.47)  |
|               | African        | 1.80                                                         | 2.16 (1.45-3.23)   | 2.76                            | 2.12 (1.72-2.52)  | 3.18                            | 1.91 (1.51-2.31)  |
|               | Latinx         | 1.88                                                         | 2.44 (1.11-5.34)   | 2.74                            | 1.91 (1.15-2.67)  | 2.58                            | 1.68 (0.93-2.43)  |
|               | Asian          | 1.84                                                         | 3.94 (0.57-27.40)  | 2.56                            | 3.94 (2.00-5.88)  | 2.73                            | 5.31 (3.49-7.13)  |
|               | Combined       | 1.85                                                         | 2.07 (1.79-2.39)   | 3.27                            | 2.13 (1.98-2.28)  | 2.82                            | 2.17 (2.02-2.32)  |
| <b>Top 2%</b> | European       | 2.38                                                         | 2.65 (2.02-3.48)   | 3.89                            | 3.16 (2.88-3.44)  | 3.21                            | 2.92 (2.64-3.20)  |
|               | African        | 2.23                                                         | 2.60 (1.38-4.90)   | 3.14                            | 2.39 (1.76-3.02)  | 3.62                            | 1.83 (1.21-2.45)  |
|               | Latinx         | 2.31                                                         | 6.89 (1.60-29.70)  | 3.18                            | 3.22 (1.82-4.02)  | 2.99                            | 2.89 (1.70-4.08)  |
|               | Asian          | 2.27                                                         | 7.03 (0.27-182.0)  | 2.98                            | 7.03 (3.78-10.30) | 3.18                            | 4.95 (1.42-8.48)  |
|               | Combined       | 2.27                                                         | 2.83 (2.22-3.60)   | 3.78                            | 2.86 (2.61-3.11)  | 3.28                            | 2.77 (2.53-3.01)  |
| <b>Top 1%</b> | European       | 2.60                                                         | 3.22 (2.17-4.78)   | 4.25                            | 2.97 (2.58-3.36)  | 3.51                            | 3.06 (2.66-3.46)  |
|               | African        | 2.51                                                         | 2.51 (1.02-6.14)   | 3.39                            | 3.29 (2.37-4.21)  | 3.91                            | 1.46 (0.60-2.32)  |
|               | Latinx         | 2.59                                                         | 7.46 (1.18-47.10)  | 3.47                            | 5.31 (3.68-6.94)  | 3.27                            | 5.31 (3.68-6.94)  |
|               | Asian          | 2.56                                                         | 1.16 (.0002-579.0) | 3.25                            | 1.16 (-5.05-7.37) | 3.47                            | 1.16 (-5.05-7.37) |
|               | Combined       | 2.55                                                         | 3.35 (2.36-4.76)   | 4.13                            | 3.06 (2.70-3.42)  | 3.57                            | 2.89 (2.55-3.23)  |

**Supplementary Table 10.** GPS effects in the eMERGE-III cohorts defined by (a) genetic ancestry and (b) self-reported race/ethnicity, with comparison of CKD phenotypes defined using race-adjusted CKD-EPI equation vs. CKD-EPI 2021 (without race) equation. The numbers of cases and controls included in each analysis are provided after exclusion of G2, but including kidney failure patients with kidney transplant or on dialysis.

**A. Genetic Ancestry**

| Genetic Ancestry | Phenotype                      | Case/Control | OR per SD (95% CI)            | AUC (Crude)   | Nagelkerke R2 |
|------------------|--------------------------------|--------------|-------------------------------|---------------|---------------|
| European         | CKD-EPI Race-adjusted Equation | 10572/8030   | 1.38 (1.34-1.43), P=9.33E-84  | 0.771 (0.599) | 0.022         |
|                  | CKD-EPI 2021 (New) Equation    | 9435/12615   | 1.39 (1.35-1.43), P=3.69E-110 | 0.728 (0.596) | 0.026         |
| African          | CKD-EPI Race-adjusted Equation | 1143/1600    | 1.31 (1.20-1.43), P=1.27E-09  | 0.787 (0.568) | 0.014         |
|                  | CKD-EPI 2021 (New) Equation    | 1358/1401    | 1.37 (1.26-1.49), P=1.04E-12  | 0.780 (0.587) | 0.019         |
| Latinx           | CKD-EPI Race-adjusted Equation | 382/533      | 1.33 (1.11-1.59), P=2.24E-03  | 0.857 (0.580) | 0.009         |
|                  | CKD-EPI 2021 (New) Equation    | 359/1027     | 1.41 (1.20-1.66), P=2.65E-05  | 0.888 (0.599) | 0.013         |
| Asian            | CKD-EPI Race-adjusted Equation | 96/97        | 1.76 (1.09-2.83), P=2.06E-02  | 0.915 (0.573) | 0.020         |
|                  | CKD-EPI 2021 (New) Equation    | 93/178       | 1.60 (1.02-2.49), P=4.08E-02  | 0.908 (0.560) | 0.012         |

**B. Self-reported Race/Ethnicity**

| Self-report | Phenotype                      | Case/Control | OR per SD (95% CI)            | AUC (Crude)   | Nagelkerke R2 |
|-------------|--------------------------------|--------------|-------------------------------|---------------|---------------|
| European    | CKD-EPI Race-adjusted Equation | 10344/7890   | 1.39 (1.34-1.43), P=6.95E-84  | 0.772 (0.600) | 0.022         |
|             | CKD-EPI 2021 (New) Equation    | 9358/12276   | 1.40 (1.36-1.44), P=1.42E-111 | 0.729 (0.597) | 0.027         |
| Black       | CKD-EPI Race-adjusted Equation | 1034/1619    | 1.34 (1.23-1.47), P=1.31E-10  | 0.785 (0.582) | 0.016         |
|             | CKD-EPI 2021 (New) Equation    | 1305/1392    | 1.37 (1.25-1.50), P=6.00E-12  | 0.796 (0.596) | 0.017         |
| Hispanic    | CKD-EPI Race-adjusted Equation | 259/343      | 1.42 (1.13-1.79), P=2.30E-03  | 0.869 (0.618) | 0.012         |
|             | CKD-EPI 2021 (New) Equation    | 330/603      | 1.44 (1.17-1.76), P=4.60E-04  | 0.896 (0.612) | 0.010         |
| Asian       | CKD-EPI Race-adjusted Equation | 105/147      | 1.42 (0.95-2.12), P=8.39E-02  | 0.902 (0.509) | 0.008         |
|             | CKD-EPI 2021 (New) Equation    | 106/227      | 1.57 (1.08-2.27), P=1.76E-02  | 0.890 (0.501) | 0.014         |

**Supplementary Table 11. Comparison of the polygenic risk score published by Yu et al. with the present study: (a) summary of the design, optimization, and testing strategies; (b) comparison of the performance characteristics of the polygenic score published by Yu et al. with the score from the present study across the ancestry-defined eMERGE-III case-control cohorts. Adjusted AUC refers to the area under the receiver operating curve for the full model (PRS, age, sex, diabetes, and ancestry PCs). Crude AUC (in parenthesis) refers to the area under the receiver operating curve for the PRS predictor alone. Variance explained was estimated as a Nagelkerke pseudo-R<sup>2</sup> and refers to the variance in case-control status explained by the PRS predictor alone. Performance differences in the African-ancestry testing cohort highlighted in red.**

### A. Design, Optimization, and Testing Strategies

|                            | Yu et al. ( <i>JASN</i> 2021)                                                               | Khan et al. ( <i>present study</i> )                                                      |
|----------------------------|---------------------------------------------------------------------------------------------|-------------------------------------------------------------------------------------------|
| <b>Design</b>              |                                                                                             |                                                                                           |
| GWAS summary statistics    | CKDGen without ARIC + 90% of UKBB                                                           | CKDGen meta-analysis GWAS for eGFR                                                        |
| GWAS phenotype             | Estimated GFR                                                                               | Estimated GFR                                                                             |
| GWAS sample size           | N=1,159,871                                                                                 | N=765,348                                                                                 |
| GWAS ancestral composition | 82% European<br>16% Asian<br>1.5% African<br><1% Hispanic                                   | 75% European<br>23% Asian<br>2% African<br><1% Hispanic                                   |
| External LD reference      | N=608 (1000G multiethnic subset)                                                            | N=2,504 (1000G all populations)                                                           |
| <i>APOL1</i> risk genotype | Not included                                                                                | Included under a recessive model                                                          |
| Covariates                 | Age, sex, diabetes, PCs of ancestry                                                         | Age, sex, diabetes, PCs of ancestry                                                       |
| <b>Optimization</b>        |                                                                                             |                                                                                           |
| Best performing model      | LDpred (1.5M variants)                                                                      | P+T (41K variants)                                                                        |
| Optimization datasets      | 10% of UKBB (N=45,158)                                                                      | 70% UKBB European ancestry (N=177,208) AND 100% UKBB African ancestry (N=7,158)           |
| <b>Testing</b>             |                                                                                             |                                                                                           |
| Overall Strategy           | ARIC prospective cohort (total N=11,737)                                                    | 15 Case-Control Cohorts (total N=123,844)                                                 |
| Outcome definition         | Incident CKD (eGFR <60 mL/min/1.73 m <sup>2</sup> plus ≥30% eGFR decline during follow-up). | CKD stage 3 or above (eGFR <60 mL/min/1.73) including ESRD (chronic dialysis, transplant) |
| European ancestry          | ARIC Europeans (N=8,866)                                                                    | 3 European ancestry cohorts (N=97,050)                                                    |
| African ancestry           | ARIC African Americans (N=2,871)                                                            | 6 African ancestry cohorts (N=14,544)                                                     |
| Hispanic/Latinx ancestry   | NA                                                                                          | 2 admixed ancestry Latinx cohorts (N=3,625)                                               |
| Asian ancestry             | NA                                                                                          | 4 Asian cohorts (N=8,625)                                                                 |

### B. Performance Testing

| Performance Metrics                                   | Yu et al. ( <i>JASN</i> 2021)         | Khan et al. ( <i>present study</i> )  |
|-------------------------------------------------------|---------------------------------------|---------------------------------------|
| <b>Adjusted AUC (Crude AUC), Pseudo R<sup>2</sup></b> |                                       |                                       |
| European (N case/control = 10,572/8,030)              | AUC 0.78 (0.61), R <sup>2</sup> 0.035 | AUC 0.77 (0.60), R <sup>2</sup> 0.022 |
| African (N case/control = 1,143/1,600)                | AUC 0.78 (0.55), R <sup>2</sup> 0.010 | AUC 0.78 (0.57), R <sup>2</sup> 0.014 |
| Latinx (N case/control = 382/533)                     | AUC 0.86 (0.58), R <sup>2</sup> 0.012 | AUC 0.86 (0.58), R <sup>2</sup> 0.009 |
| Asian (N case/control = 96/97)                        | AUC 0.91 (0.56), R <sup>2</sup> 0.009 | AUC 0.92 (0.57), R <sup>2</sup> 0.020 |
| <b>OR per SD (95% CI), P-value</b>                    |                                       |                                       |
| European (N case/control = 10,572/8,030)              | 1.51 (1.46-1.56), P=6.25E-129         | 1.38 (1.35-1.40), P=1.58E-83          |
| African (N case/control = 1,143/1,600)                | 1.28 (1.17-1.41), P=1.07E-07          | 1.31 (1.09-1.56), P=1.30E-09          |
| Latinx (N case/control = 382/583)                     | 1.44 (1.18-1.76), P=4.27E-04          | 1.33 (1.11-1.59), P=2.24E-03          |
| Asian (N case/control = 96/97)                        | 1.44 (0.93-2.23), P=2.23E-01          | 1.76 (1.09-2.83), P=2.06E-02          |
| <b>OR for top 2% (95% CI), P-value</b>                |                                       |                                       |
| European (N case/control = 10,572/8,030)              | 3.60 (2.70-4.79), P=1.25E-18          | 2.65 (2.02-3.48), P=1.35E-12          |
| African (N case/control = 1,143/1,600)                | 1.92 (1.03-3.59), P=3.93E-02          | 2.60 (1.38-4.90), P=3.10E-03          |
| Latinx (N case/control = 382/583)                     | 1.55 (0.48-5.07), P=4.69E-01          | 6.89 (1.60-29.07), P=9.78E-03         |
| Asian (N case/control = 96/97)                        | 1.72 (0.02-145.0), P=8.02E-01         | 7.03 (0.27-182.0), P=2.38E-01         |
